# Supplementary material for: Taxonomical and functional analyses of epifaunal polychaetes associated with Mussismilia spp.: the effects of coral growth morphology
Source: PeerJ. 2023 Apr 13;11:e15144. doi: 10.7717/peerj.15144 (PMC10106086; doi:10.7717/peerj.15144)
Supplement: Supplemental Information 1 [file peerj-11-15144-s001.xlsx]

## Sheet: Planilha1
	CMHA01	CMHA 05	CMHA06	CMHA 08	CMHA09	CMHA11	CMHA12	CMHA 14	CMHA 15	CMHA 16	CMB03	CMB04	CMB05	CMB06	CMB07	CMB10	CMB12	CMB13	CMB14	CMB15	CMH10	CMH 11	CMH 14	CMH 17	CMH 18	CMH 19	CMH 20	CMH 21	CMH23	CMH24	BMHA 01	BMHA 03	BMHA05	BMHA06	BMHA 08	BMHA 09	BMHA 10	BMHA 13	BMHA15	BMHA 16	BMB 01	BMB 02	BMB 03	BMB 05	BMB 08	BMB10	BMB 09	BMB 12	BMB 13
Eunicesp.1	6	1	3	2	4	2	1	0	2	3	0	0	0	0	2	0	2	1	0	0	0	0	0	0	0	0	0	0	0	0	0	0	0	0	0	0	0	3	0	0	0	0	0	0	0	0	0	0	0
Euniceinsularis	11	0	7	0	1	7	0	0	14	4	5	0	0	0	0	0	0	0	0	1	0	0	3	0	0	0	0	0	0	0	0	0	0	0	0	0	12	0	1	0	0	0	0	0	0	0	0	0	0
Lysidicesp.1	5	1	0	0	0	0	1	0	0	4	0	0	0	3	2	2	0	0	0	0	0	0	3	0	0	0	1	0	0	0	0	0	0	0	0	0	0	1	0	0	0	0	0	0	0	0	0	0	0
Lysidicesp.2	0	0	1	1	0	0	0	0	0	0	0	0	0	0	0	0	0	0	0	0	0	0	0	0	0	0	0	1	0	1	0	0	0	0	0	0	0	1	1	0	0	0	0	0	0	0	0	0	0
Nereididae juve	0	3	0	0	0	2	0	0	5	2	0	0	0	1	0	2	1	0	0	0	0	0	0	0	0	0	0	0	0	0	0	0	0	0	0	0	0	0	1	2	0	0	1	0	0	0	0	0	0
Nereididae n. ident.	0	0	0	0	0	3	0	0	3	4	2	0	0	1	0	0	0	1	0	1	0	0	1	0	0	0	0	0	0	0	0	0	0	0	0	0	2	1	1	0	0	0	0	0	0	0	0	0	2
Platynereis sp.	0	0	0	4	0	0	2	0	0	0	0	0	0	0	0	0	0	0	0	0	0	0	0	0	0	0	0	0	0	0	1	0	0	0	0	0	0	5	0	0	0	0	0	0	0	0	0	0	0
Ceratonereis hircinicola	0	0	0	0	0	1	0	0	1	0	0	1	0	0	0	1	0	0	0	0	0	0	0	0	0	0	0	0	0	0	1	0	0	0	0	0	0	0	0	0	0	0	0	0	0	0	0	0	0
Ceratonereis excisa	0	0	0	0	0	1	0	0	0	0	0	3	0	0	0	0	1	0	0	0	0	0	2	0	0	0	0	0	0	0	0	0	0	0	0	0	1	0	6	8	0	0	0	0	0	12	0	0	3
Ceratonereis cf. vittata	0	0	0	0	0	1	0	0	5	0	0	1	0	0	0	0	0	0	0	0	0	0	0	0	0	0	0	0	0	0	0	0	0	0	0	0	0	0	0	0	0	0	0	0	0	0	0	0	0
Nereis cf. serrata	0	0	0	0	0	0	0	0	0	0	1	0	0	0	0	0	1	0	0	0	0	0	0	0	0	0	0	0	0	0	0	0	0	0	0	0	0	0	0	0	0	0	0	0	0	5	0	0	0
Schistomeringos rudolphi	2	1	0	0	7	1	0	0	2	1	0	0	0	2	0	3	0	0	0	6	0	0	0	0	0	0	0	0	0	0	0	0	0	0	0	0	0	0	0	0	0	0	0	0	0	0	0	0	0
Ophryotrocha sp.	0	0	0	0	0	0	0	0	0	0	0	0	0	0	0	0	0	0	0	1	0	0	0	0	0	0	0	0	0	0	0	0	0	0	0	0	0	0	0	0	0	0	0	0	0	0	0	0	0
Terebellidae n. ident.	16	1	0	2	0	0	0	0	0	0	7	0	0	0	0	12	0	1	0	0	0	0	0	0	0	0	0	0	0	0	2	0	0	0	0	0	0	1	0	0	0	0	0	0	0	0	0	0	0
Lanicola sp. (prob hutchinsae)	5	0	0	0	0	0	0	0	0	0	2	0	0	0	0	0	0	0	0	0	0	0	0	0	0	0	0	0	0	0	0	0	0	0	0	0	0	0	0	0	0	0	0	0	0	0	0	0	0
Streblosoma sp.	0	0	0	0	0	2	0	0	1	2	0	0	0	0	0	0	0	0	0	0	0	0	0	0	0	0	0	0	0	0	0	0	0	0	0	0	1	0	0	0	0	0	0	0	0	0	0	0	0
Syllis gracilis	16	4	39	2	8	43	0	0	19	0	5	0	0	3	0	4	1	0	0	2	0	0	3	0	0	0	0	4	10	3	1	0	0	0	0	0	2	1	3	0	0	0	0	0	0	0	0	0	0
Syllis beneliahuae	0	0	0	0	0	1	0	0	0	0	0	0	0	0	0	0	0	0	0	0	0	0	0	0	0	0	0	0	0	0	1	0	0	0	0	0	0	0	0	0	0	0	0	0	0	0	0	0	0
Syllis corallicolla	5	0	1	2	0	3	0	0	1	0	0	0	0	0	0	0	0	0	0	1	0	0	0	0	0	0	0	2	0	3	0	0	0	0	0	0	0	1	1	1	0	0	0	0	0	0	0	0	0
Exogone sp. 1	2	0	1	3	1	7	0	0	2	0	3	0	0	1	0	0	0	0	0	2	0	0	4	0	0	0	2	0	4	1	0	0	0	0	0	0	1	0	25	9	0	0	0	0	1	1	0	0	2
Exogone sp. 2	0	0	0	0	3	6	0	0	1	0	0	0	0	4	0	0	0	0	0	1	0	0	0	0	0	0	0	1	1	1	1	0	0	0	0	0	2	0	0	2	0	1	0	0	0	0	0	0	0
Exogone cf. africana	0	0	0	0	0	0	0	0	0	0	0	0	0	0	0	0	0	0	0	0	0	0	0	0	0	0	0	0	0	0	0	0	0	0	0	0	0	3	0	1	0	0	0	0	0	0	0	0	1
Haplosyllis sp. 1	3	0	0	0	2	13	0	0	1	0	0	0	0	0	0	0	0	0	0	0	0	0	0	7	0	0	0	2	0	0	0	0	0	0	0	0	0	0	3	3	0	0	0	0	0	0	0	0	0
Sphaerosyllis brasiliensis	2	1	0	0	1	0	2	0	2	0	0	0	0	4	0	0	0	0	0	0	0	0	2	0	0	0	0	0	0	0	3	0	0	0	0	0	13	0	29	12	0	0	0	0	0	0	0	0	14
Sphaerosyllis sp. 1	1	0	0	0	0	0	0	0	0	0	0	0	0	0	0	0	0	0	0	0	0	0	0	0	0	0	0	0	0	0	0	0	0	0	0	0	0	0	1	3	0	0	0	0	0	0	0	0	0
Trypanosyllis sp. 1 (zebra?)	0	0	0	0	0	3	0	0	0	2	0	1	0	0	0	1	0	0	0	0	0	0	0	0	0	0	0	0	0	0	2	0	0	0	0	0	0	0	0	0	0	0	1	0	0	0	0	0	0
Branchiosyllis exilis	1	0	8	0	0	7	0	0	1	1	0	0	0	0	0	1	1	0	0	0	0	0	0	2	0	0	0	0	0	2	0	0	0	0	0	0	0	0	2	0	0	0	0	0	0	0	0	0	0
Branchiosyllis sp. (short, curved falcigers throughout)	0	0	0	0	1	0	0	0	0	0	0	0	0	0	0	0	0	0	0	0	0	0	0	0	0	0	0	0	0	0	0	0	0	0	0	0	0	0	0	1	0	0	0	0	0	0	0	0	0
Odontosyllis cf. fulgurans	1	0	2	0	0	0	0	0	0	0	0	0	0	0	0	0	0	0	0	0	0	0	1	0	0	0	0	0	0	0	0	0	0	0	0	0	0	1	0	2	0	1	0	0	0	0	0	0	0
Odontosyllis guilhermoi	2	0	2	0	0	1	0	0	1	0	0	0	0	1	0	0	0	0	0	0	0	0	0	0	0	0	0	0	0	0	0	0	0	0	0	0	0	0	0	0	0	0	0	0	0	0	0	0	0
Pionosyllis sp.	0	0	0	0	0	0	0	0	0	0	0	0	0	0	0	0	0	0	0	0	0	0	0	0	0	0	0	0	0	0	0	0	0	0	0	0	0	0	0	0	0	0	0	0	0	0	0	0	0
Opisthosyllis brunnea	0	0	0	0	0	0	0	0	0	0	0	0	0	0	0	0	2	0	0	0	0	0	0	0	0	0	0	0	3	0	0	0	0	0	0	0	0	0	0	0	0	0	0	0	0	0	0	0	0
Salvatoria sp.	0	0	0	0	0	0	0	0	0	0	0	0	0	0	0	0	0	0	0	0	0	0	1	0	0	0	0	0	0	0	0	0	0	0	0	0	0	0	0	1	0	0	0	0	0	0	0	0	0
Amblyosyllis sp.	1	0	0	0	0	0	0	0	0	0	0	0	0	0	0	0	0	0	0	0	0	0	0	0	0	0	0	0	0	0	0	0	0	0	0	0	0	0	0	0	0	0	0	0	0	0	0	0	0
Lumbrineris sp. 1 inflata?	0	0	3	3	2	8	0	0	4	2	0	0	0	1	0	0	0	0	0	0	0	0	0	0	0	0	0	2	0	2	0	0	0	0	0	0	0	0	2	0	0	0	0	0	0	0	0	0	0
Sabellidae n. ident (Branchiomma?)	0	0	0	0	0	0	0	0	0	0	0	0	0	0	0	0	0	0	0	0	0	0	0	0	0	0	0	1	0	1	0	0	0	0	0	0	0	0	0	0	0	0	0	0	0	0	0	0	0
Sabellidae n. ident (no eyes)	1	0	0	0	0	0	0	0	0	2	0	0	0	0	0	0	0	0	0	0	0	0	0	2	0	0	0	0	0	0	0	0	0	0	0	0	0	0	0	0	0	0	0	0	0	0	0	0	0
Armandia sp. 1	0	0	0	0	0	0	1	0	0	0	0	0	0	0	0	0	0	0	0	0	0	0	0	0	0	0	0	1	0	1	1	0	1	0	0	0	0	0	1	1	0	1	0	0	0	0	0	0	0
Polyophthalmus sp.	0	0	0	0	0	0	0	0	0	0	0	0	0	0	0	0	0	0	0	0	0	0	0	0	0	0	0	0	0	0	0	0	2	0	0	0	0	0	0	0	0	0	0	0	0	0	0	0	0
Phyllodocidae n ident.	0	0	0	0	0	0	0	0	0	0	0	0	0	0	0	0	0	0	0	0	0	0	0	0	0	0	0	0	0	0	1	0	0	0	0	0	0	0	0	0	0	0	0	0	2	0	0	0	0
Taylorpholoe hirsuta	0	0	0	0	0	0	0	0	0	0	0	0	0	0	0	0	0	0	0	0	0	0	0	0	0	0	0	0	0	0	2	0	0	0	0	0	0	1	4	5	0	0	1	0	0	0	0	0	3
Scyphoproctus sp.	0	0	0	0	0	0	0	0	0	0	1	0	0	0	0	0	0	0	0	0	0	0	0	0	0	0	0	3	0	3	1	0	0	0	0	0	2	0	4	0	0	0	0	0	0	1	0	0	0
Spio sp. 1	0	0	0	0	0	0	0	0	0	0	0	0	0	1	0	0	0	0	0	0	0	0	0	0	0	0	0	0	0	0	1	0	0	0	0	0	0	0	0	0	0	0	0	0	0	0	0	0	0
Pseudopolydora sp.	0	0	0	0	0	0	0	0	0	0	0	0	0	0	0	0	0	0	0	0	0	0	0	0	0	0	0	0	0	0	0	0	0	0	0	0	141	0	0	0	0	0	0	0	0	0	0	0	0
Spionidae n. ident	1	0	0	0	0	0	0	0	0	0	0	0	0	0	0	0	0	0	0	0	0	0	0	0	0	0	0	0	0	0	0	0	0	0	0	0	0	0	0	0	0	0	0	0	0	0	0	0	0
Asclerocheilus cf. tropicus	0	0	0	0	0	0	0	0	0	0	0	0	0	0	0	0	0	0	0	0	0	0	0	0	0	0	0	0	0	0	1	0	0	0	0	0	0	0	0	0	0	0	0	0	0	0	0	0	0
Bhawania brunnea	2	0	0	0	0	0	0	0	0	0	0	0	0	0	0	0	0	0	0	0	0	0	0	0	0	0	0	0	0	0	0	0	0	0	0	0	0	1	0	0	0	0	0	0	0	0	0	0	0
Harmothoe aculeata	2	0	0	0	0	0	0	0	0	0	0	0	0	0	0	0	0	0	0	0	0	0	0	0	0	0	0	0	0	0	0	0	0	0	0	0	0	1	0	1	0	0	1	0	1	0	0	0	0
Eurythoe complanata	0	0	0	0	0	1	0	0	1	0	0	1	0	0	0	0	0	0	0	0	0	0	0	0	0	0	0	0	0	0	0	0	0	0	0	0	0	0	1	0	0	0	0	0	0	0	0	0	0
Salmacina ceciliae	4	0	0	0	0	0	0	0	0	0	0	0	0	0	0	1	0	0	0	0	0	0	0	0	0	0	0	0	0	0	0	0	0	0	0	0	0	0	0	1	0	0	2	0	0	0	0	0	0
Pseudovermilia ocidentallis	0	0	0	0	0	0	0	0	0	0	0	0	0	0	0	0	0	0	0	0	0	0	0	0	0	0	0	0	0	0	0	0	0	0	0	0	0	0	0	0	0	0	1	0	0	0	0	0	0
Vermiliopsis sp.	0	0	0	0	0	0	0	0	1	0	0	0	0	0	0	0	0	0	0	0	0	0	0	0	0	0	0	0	0	0	0	0	0	0	0	0	0	0	0	0	0	0	0	0	0	0	0	0	0
Tubificidae	0	0	0	0	0	0	0	0	0	0	0	0	0	0	0	0	0	0	0	0	0	0	0	0	0	0	0	0	0	0	0	0	0	0	0	0	0	0	0	0	0	0	1	0	0	0	0	0	1
Dodecaceria sp.	0	0	0	0	0	0	0	0	0	0	0	0	0	0	0	0	0	0	0	0	0	0	0	0	0	0	0	0	0	0	0	0	0	0	0	0	0	0	0	0	0	0	0	0	0	0	0	0	0
Cirratulidae bitentaculado	0	0	0	0	0	0	0	0	0	0	0	0	0	0	0	0	0	0	0	0	0	0	1	0	0	0	0	0	0	0	0	0	0	0	0	0	0	0	0	0	0	0	0	0	0	0	0	0	0
Orbiniidae n ident.	0	0	0	0	0	0	0	0	0	0	0	0	0	0	0	0	0	0	0	0	0	0	1	0	0	0	0	0	0	0	0	0	0	0	0	0	0	0	0	0	0	0	0	0	0	0	0	0	0
Hesionidae n ident.	0	0	1	0	0	0	0	0	0	0	0	0	0	0	0	0	0	0	0	0	0	0	0	0	0	0	0	0	0	0	0	0	0	0	0	0	0	0	0	0	0	0	0	0	0	0	0	0	0
Sphaerodoridae n ident.	0	0	0	0	1	0	0	0	0	0	0	0	0	0	0	0	0	0	0	0	0	0	0	0	0	0	0	0	0	0	0	0	0	0	0	0	0	0	1	0	0	0	0	0	0	0	0	0	0
Sabellariidae n. ident.	3	0	0	0	0	0	0	0	0	0	0	0	0	0	0	0	0	0	0	0	0	0	0	0	0	0	0	0	0	0	0	0	0	0	0	0	0	0	0	0	0	0	0	0	0	0	0	0	0
[truncated: 11 more columns]

## Sheet: Planilha2
	feeding habitus						Movement			mouth apparatus			body structure		Fate of ova					type of larval development			Asexual reproduction
	Omnivore	Carnivore	Suspension feeder	surface deposit feeder	subsurface deposit feeder	interface feeders	motile	discrete motile	sessile	tentacle	muscular eversible pharynx	non-muscular eversible pharynx	Body length (mm)	N chaetigers	Free spawning	brooding on the outside of body	brooding inside the body	brooding of encapsulated embryos	brooding inside tube	Planktonik	lecithotrophic larvae	Direct benthic development	stolonization	fragmentation
Eunice sp. 1 (nr. mutilata)	1	0	0	0	0	0	1	0	0	0	1	0	50	150	1	0	0	0	0	1	0	0	0	0
Eunice insularis	1	0	0	0	0	0	1	0	0	0	1	0	29.5	127	1	0	0	0	0	1	0	0	0	0
Lysidice sp. 1	1	0	0	0	0	0	1	0	0	0	1	0	15	100	1	0	0	0	0	1	0	0	0	0
Lysidice sp. 2	1	0	0	0	0	0	1	0	0	0	1	0	15	100	1	0	0	0	0	1	0	0	0	0
Nereididae juve	1	0	0	0	0	0	1	0	0	0	1	0	0		0	0	0	0	0	0	0	0	0	0
Nereididae n. ident.	1	0	0	0	0	0	1	0	0	0	1	0	0		0	0	0	0	0	0	0	0	0	0
Platynereis sp.	1	0	0	0	0	0	1	0	0	0	1	0	16	75	1	0	0	0	0	0	1	0	0	0
Ceratonereis hircinicola	1	0	0	0	0	0	1	0	0	0	1	0	13	50	0	0	0	0	1	0	0	1	0	0
Ceratonereis excisa (or mirabilis?)	1	0	0	0	0	0	1	0	0	0	1	0	22	88	0	0	0	0	1	0	0	1	0	0
Ceratonereis cf. vittata	1	0	0	0	0	0	1	0	0	0	1	0	13	50	0	0	0	0	1	0	0	1	0	0
Nereis cf. serrata	1	0	0	0	0	0	1	0	0	0	1	0	15	56	1	0	0	0	0	1	0	0	0	0
Schistomeringos rudolphi	1	0	0	0	0	0	1	0	0	0	1	0	3	45	1	0	0	0	0	0	1	0	0	0
Ophryotrocha sp.	1	0	0	0	0	0	1	0	0	0	1	0	1.5	20	0	0	0	0	1	1	0	0	0	0
Terebellidae n. ident.	0	0	0	1	0	0	0	0	1	1	0	0	0		0	0	0	0	0	0	0	0	0	0
Lanicola sp. (prob hutchinsae)	0	0	0	1	0	0	0	0	1	1	0	0	25	81	0	0	0	0	0	0	0	0	0	0
Streblosoma sp.	0	0	0	1	0	0	0	0	1	1	0	0	9	52	0	0	0	0	1	0	0	1	0	0
Syllis gracilis	1	0	0	0	0	0	1	0	0	0	1	0	9.9	72	0	0	1	0	0	0	0	1	0	0
Syllis beneliahuae	1	0	0	0	0	0	1	0	0	0	1	0	7.9	98	0	0	1	0	0	0	0	1	0	0
Syllis corallicolla	1	0	0	0	0	0	1	0	0	0	1	0	21	93	0	0	1	0	0	0	0	1	0	0
Exogone sp. 1	1	0	0	0	0	0	1	0	0	0	1	0	7.8	46	0	1	0	0	0	0	0	1	0	0
Exogone sp. 2	1	0	0	0	0	0	1	0	0	0	1	0	7.8	46	0	1	0	0	0	0	0	1	0	0
Exogone cf. africana	1	0	0	0	0	0	1	0	0	0	1	0	3	40	0	1	0	0	0	0	0	1	0	0
Haplosyllis sp. 1	1	0	0	0	0	0	1	0	0	0	1	0	7	45	0	0	0	0	0	0	0	0	1	0
Sphaerosyllis brasiliensis	1	0	0	0	0	0	1	0	0	0	1	0	3	37	0	1	0	0	0	0	0	1	0	0
Sphaerosyllis sp. 1	1	0	0	0	0	0	1	0	0	0	1	0	3	37	0	1	0	0	0	0	0	1	0	0
Trypanosyllis sp. 1 (zebra?)	1	0	0	0	0	0	1	0	0	0	1	0	32	170	0	0	0	0	0	0	0	0	1	0
Branchiosyllis exilis	1	0	0	0	0	0	1	0	0	0	1	0	22	74	0	0	1	0	0	0	0	1	0	0
Branchiosyllis sp. (short, curved falcigers throughout)	1	0	0	0	0	0	1	0	0	0	1	0	22	74	0	0	1	0	0	0	0	1	0	0
Odontosyllis cf. fulgurans	1	0	0	0	0	0	1	0	0	0	1	0	5	50	0	1	0	0	0	0	0	1	0	0
Odontosyllis guilhermoi	1	0	0	0	0	0	1	0	0	0	1	0	19	135	0	1	0	0	0	0	0	1	0	0
Pionosyllis sp.	1	0	0	0	0	0	1	0	0	0	1	0	2.7	18	0	1	0	0	0	0	0	1	0	0
Opisthosyllis brunnea	1	0	0	0	0	0	1	0	0	0	1	0	23.2	76	0	0	0	0	0	0	0	0	1	0
Salvatoria sp.	1	0	0	0	0	0	1	0	0	0	1	0	2.1	31	0	1	0	0	0	0	0	1	0	0
Amblyosyllis sp.	1	0	0	0	0	0	1	0	0	0	1	0	5	13	0	1	0	0	0	0	0	1	0	0
Lumbrineris sp. 1 inflata?	1	0	0	0	0	0	1	0	0	0	1	0	48	133	0	0	0	0	1	0	0	1	0	0
Sabellidae n. ident (Branchiomma?)	0	0	1	0	0	0	0	0	1	1	0	0	29	81	0	1	0	0	0	0	1	0	0	1
Sabellidae n. ident (no eyes)	0	0	1	0	0	0	0	0	1	1	0	0	0		0	1	0	0	0	0	1	0	0	0
Armandia sp. 1	0	0	0	0	1	0	1	0	0	0	0	1	8	28	1	0	0	0	0	1	0	0	0	0
Polyophthalmus sp.	0	0	0	0	1	0	1	0	0	0	0	1	7.5	26	1	0	0	0	0	1	0	0	0	0
Phyllodocidae n ident.	0	1	0	0	0	0	1	0	0	0	1	0	0		1	0	0	0	0	1	0	0	0	0
Taylorpholoe hirsuta	0	1	0	0	0	0	1	0	0	0	1	0	1.5	19	1	0	0	0	0	1	0	0	0	0
Scyphoproctus sp.	0	0	0	0	1	0	1	0	0	0	0	1	21	83	0	0	0	0	1	0	0	0	0	0
Spio sp. 1	0	0	0	0	0	1	0	1	0	1	0	0	22	65	0	0	0	1	0	1	0	0	0	0
Pseudopolydora sp.	0	0	0	0	0	1	0	1	0	1	0	0	20	55	0	0	0	1	0	1	0	0	0	0
Spionidae n. ident	0	0	0	0	0	1	0	1	0	1	0	0	0		0	0	0	0	0	0	0	0	0	0
Asclerocheilus cf. tropicus	0	0	0	0	1	0	1	0	0	0	0	1	1.8	20	1	0	0	0	0	1	0	0	0	0
Bhawania brunnea	0	1	0	0	0	0	1	0	0	0	1	0	20	220	1	0	0	0	0	1	0	0	0	0
Harmothoe aculeata	0	1	0	0	0	0	1	0	0	0	1	0	22	34	1	0	0	0	0	1	0	0	0	0
Eurythoe complanata	0	1	0	0	0	0	1	0	0	0	1	0	94	94	0	1	0	0	0	0	0	1	0	0
Salmacina ceciliae	0	0	1	0	0	0	0	0	1	1	0	0	3.5	35	1	0	0	0	0	1	0	0	0	0
Pseudovermilia ocidentallis	0	0	1	0	0	0	0	0	1	1	0	0	12	44	1	0	0	0	0	1	0	0	0	0
Vermiliopsis sp.	0	0	1	0	0	0	0	0	1	1	0	0	11	65	1	0	0	0	0	1	0	0	0	0
Tubificidae	0	0	0	0	1	0	1	0	0	0	0	1	2.6	21	0	0	0	0	0	0	0	0	0	0
Dodecaceria sp.	0	0	0	1	0	0	0	0	1	1	0	0	4.5	40	1	0	0	0	0	1	0	0	0	1
Cirratulidae bitentaculado	0	0	0	1	0	0	0	0	1	1	0	1	5	48	1	0	0	0	0	1	0	0	0	0
Orbiniidae n ident.	0	0	0	0	1	0	1	0	0	0	0	1	0		0	0	0	0	0	0	0	0	0	0
Hesionidae n ident.	0	1	0	0	0	0	1	0	0	0	1	0	0		1	0	0	0	0	1	0	0	0	0
Sphaerodoridae n ident.	0	1	0	0	0	0	1	0	0	0	1	0	3.8	17	1	0	0	0	0	0	1	0	0	0
Sabellariidae n. ident.	0	0	1	0	0	0	0	0	1	1	0	0	0		1	0	0	0	0	1	0	0	0	0
